# Supplementary material for: OrganSegBench: A Comprehensive Multi-Organ Benchmark for Segmentation Foundation Models with a Practical Synergy Pathway to Clinical Application
Source: Research Square preprint supplement (doi:10.21203/rs.3.rs-7844536/v1), 2025-10-21
Supplement: Supplementary file 1 [file f6528754e5484e8f17359ec3.docx]

**Supplementary Materials**

**Supplementary Methods**

**Study Population**

This study adhered to the ethical standards of the 1975 Declaration of Helsinki. The data used in this study were obtained from the Phenobank (<https://www.phenobank.org.cn/>). Ethical approval for the collection of phenotypic data and biological samples was granted by the local research ethics committee (No.BE1828). Written informed consent was obtained from all participants. The description of distribution of dataset can be found in **Supplementary Table 1**.

**Clinical Phenotype Definition**

We selected nine major phenotypes of the cardiac region (ventricles) as evaluation targets for the clinical application performance of Segmentation Foundation Models. The definitions and quantification of these phenotypes are shown below.

| **Cardiac Phenotype Definition** |
| --- |
| Denote ,,, as the volume (mL) of the region EDLV, EDRV, ESLV and ESRV of cardiac respectively.  Then:  LVEDV = , LVESV = , RVEDV = , RVESV = ,  LVSV =LVEDV - LVESV , RVSV =RVEDV - RVESV  LVEF =LVSV/LVEDV×100 , RVEF =RVSV/RVEDV×100  LVCO = LVSV×lpha×10^-3  alpha = 60.0/duration/cycle |

where duration/cycleis the time period required for a complete heartbeat and can be read from the header file of the ‘NIFTI’ data.

**Error Distribution Computation**

| **Algorithm**: Spatial segmentation error distribution visualization among sample groups |
| --- |
| **Initialization**: Denote o as the organ to for visualization, o in {kidney, liver, spleen, lung, AO}. For each organ o, the mask of one sample in the data set is selected as the reference, which is defined as Refo.  **Input**: sample dj,j=1,..., 701, from Dataset D and segmentation results Sj of Segmentation Foundation Models with annotations Lj.  **Output**: Overall distribution of segmentation error of Segmentation Foundation Models for organ o in D。  For dj in D:  Transfer Sj, Lj into data of stl format further into point cloud data as SPj, LPj。  Compute point to point distance as DistanceSL, from SPj toLPj。  Compute point to point distance as DistanceLS, from LPjtoSPj 。  P95 = Percentile([DistanceSL,DistanceLS], 95)  DistanceSL[DistanceSL>P95] = P95  DistanceLS[DistanceLS>P95] = P95  CountIDX = 1  For pointSP in SPj:  IDXSPtoLP = find_nearest(LPj, pointSP)  DistanceSL[IDXSPtoLP] = DistanceSL[IDXSPtoLP] + DistanceLS[pointSP]  Count[IDXSPtoLP**]**  =Count[IDXSPtoLP] +1  For pointLP in LPj:  DistanceSL[IDXSPtoLP] = DistanceSL[IDXSPtoLP] /Count[IDXSPtoLP]  IDXLPtoRef= find_nearest(Refo, pointLP)  Refo[IDXLPtoRef].distance = DistanceSL[pointLP]  For pointRef in Refo:  Refo[IDXLPtoRef].distance / =701 |

**Supplementary Figures**


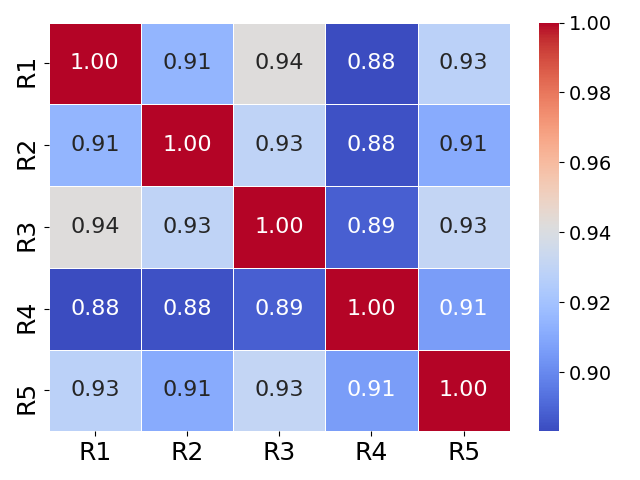


**Supplementary Figure 1**. Overall segmentation consistence among the annotations from 5 experienced radiologists (R1, R2, R3, R4, R5) for 16 organs. The values in the heatmap represent the kappa coefficients between the segmentation results of each pair of radiologists on the same dataset. We averaged the kappa values across all 16 organs for presentation. Considering the workload of repeated annotations, we selected 30 subjects from the total sample for comparative analysis.


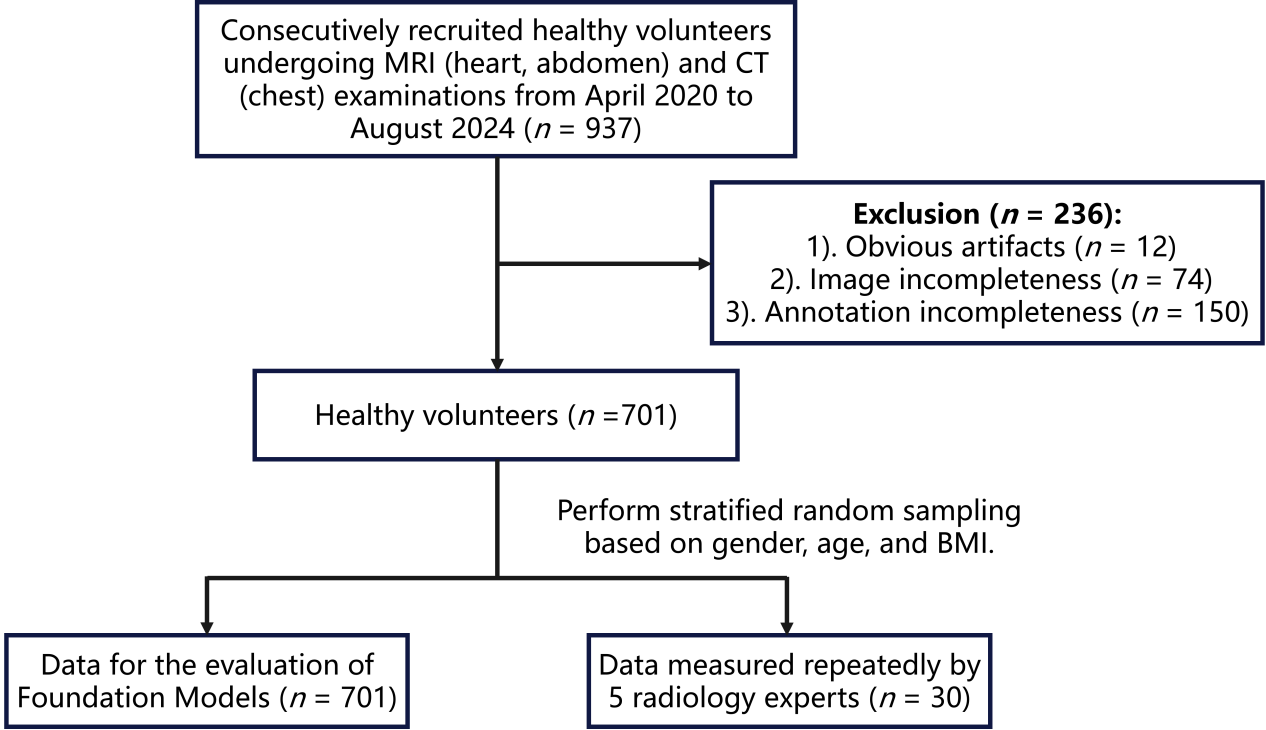


**Supplementary Figure 2**. Diagram of participants inclusion and exclusion.


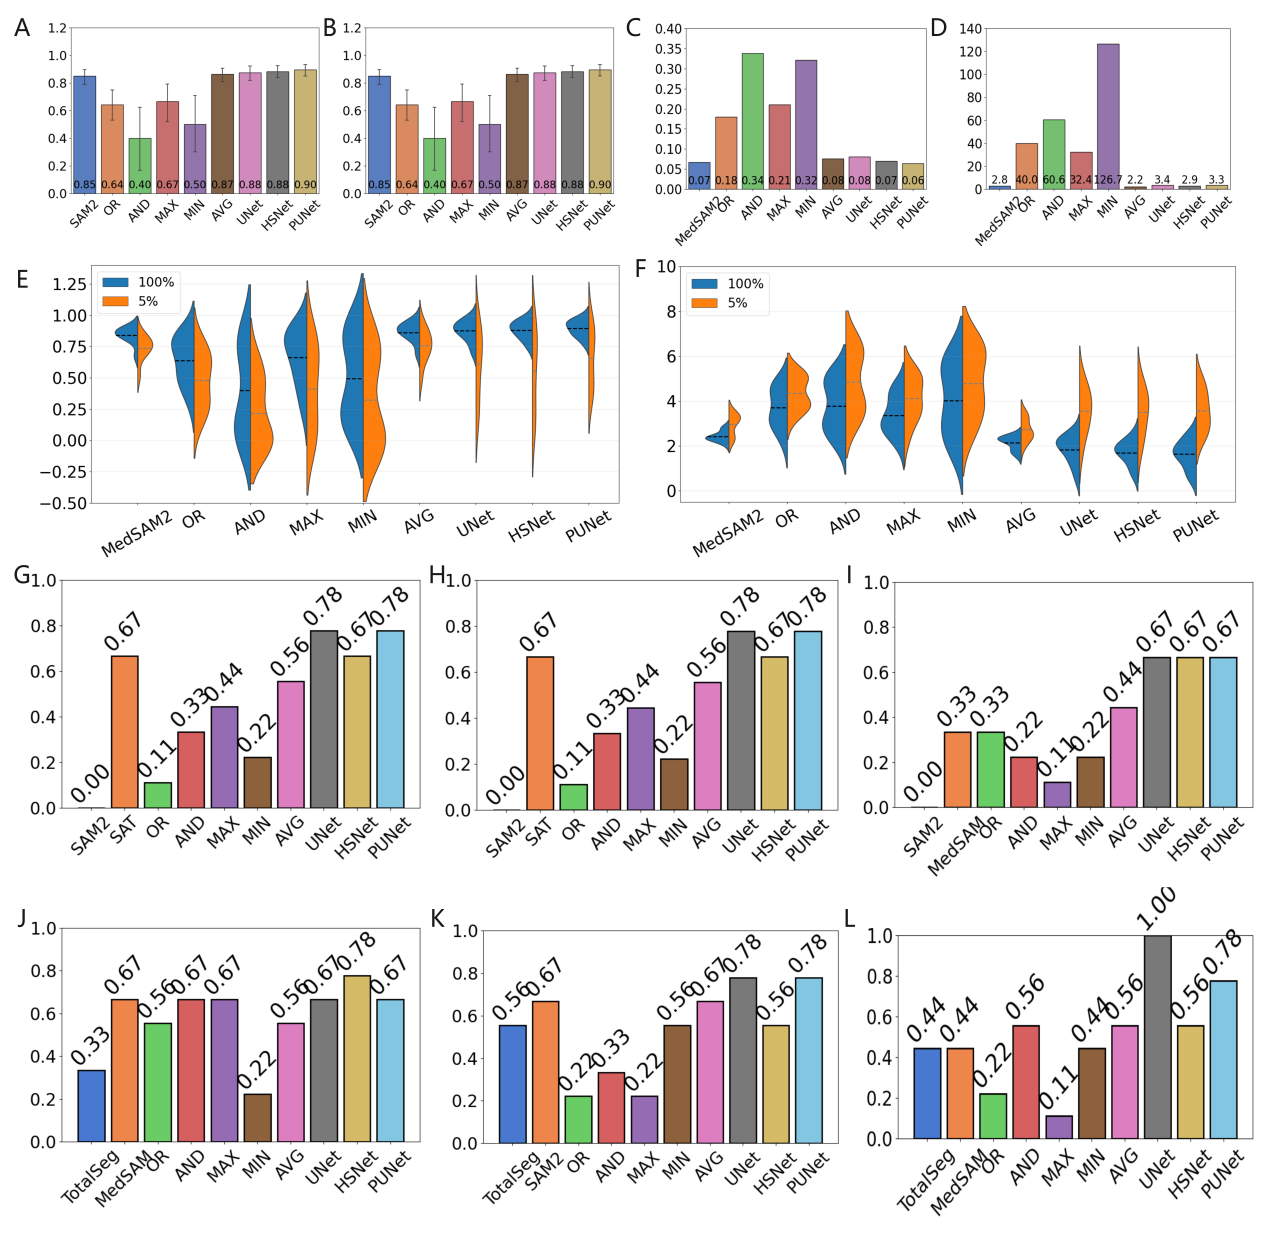


**Supplementary Figure 3.** Comparison of different ensemble learning strategies for multi-organ segmentation performances. Ensemble learning strategies resolves performance trade-offs and dominates individual models in 9 organ segmentation. Performance of ensemble strategies of five post-processing fusion and two multi-source distillation was compared against the best-performing individual models across all evaluation dimensions. **A,B,** The AVG ensemble and models of distillation achieve the highest overall accuracy (DSC and HD95). **C,D,** It also exhibits the lowest performance variance across organs, indicating superior generalization. **E,F,** For robustness, AVG maintains the highest accuracy on the most challenging 5% of cases. **G-I,** Crucially, the AVG ensemble and models of distillation maintain competitive fairness across gender, age, and BMI attributes, effectively resolving the accuracy-fairness trade-off. **M,N,** A holistic performance summary visually confirms that the ensemble learning strategy provides the best overall balance, dominating all other approaches across accuracy, robustness, fairness and generalization.


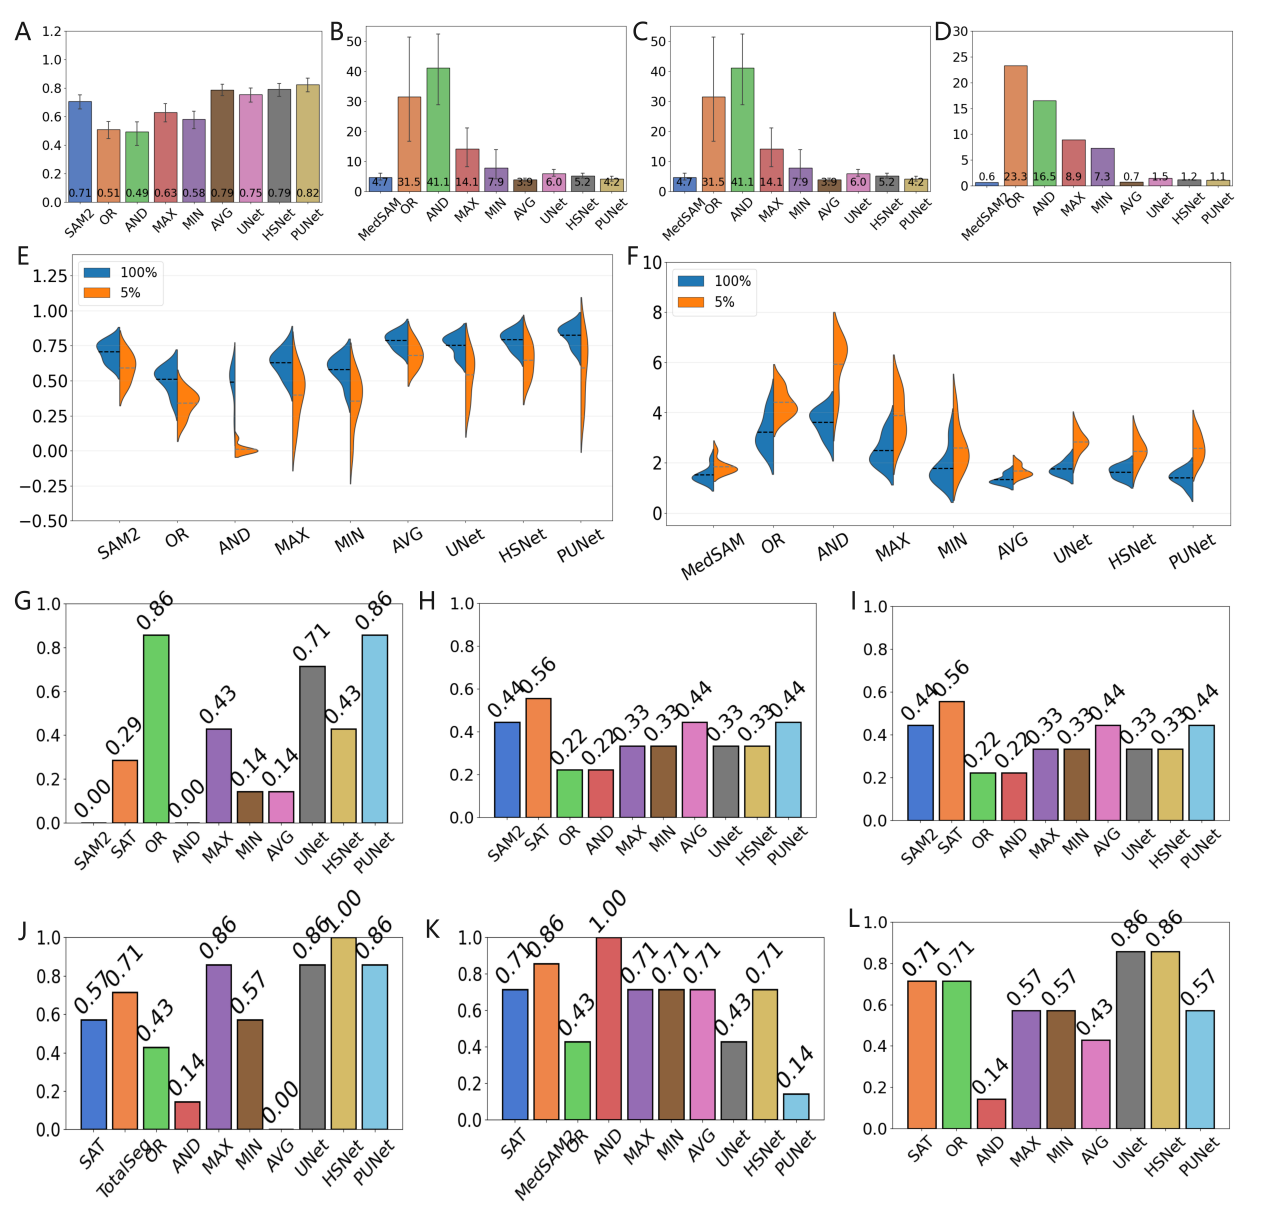


**Supplementary Figure 4.** Ensemble learning strategies resolves performance trade-offs and dominates individual models in 7 vessel segmentation. Performance of ensemble strategies of five post-processing fusion and two multi-source distillation was compared against the best-performing individual models across all evaluation dimensions. **A,B,** The AVG ensemble and models of distillation achieve the highest overall accuracy (DSC and HD95). **C,D,** It also exhibits the lowest performance variance across organs, indicating superior generalization. **E,F,** For robustness, AVG maintains the highest accuracy on the most challenging 5% of cases. **G-I,** Crucially, the AVG ensemble and models of distillation maintain competitive fairness across gender, age, and BMI attributes, effectively resolving the accuracy-fairness trade-off. **M,N,** A holistic performance summary visually confirms that the ensemble learning strategy provides the best overall balance, dominating all other approaches across accuracy, robustness, fairness and generalization.

**Supplementary Tables**

**Supplementary Table 1. Dataset attribute description with population characteristics.**

| Attribute | Total | Male | Female |
| --- | --- | --- | --- |
| Samples (n) | 701 | 288 | 413 |
| Age (years; mean, SD) | 35.09 (11.76) | 35.09 (11.42) | 35.09 (11.99) |
| Height (m; mean, SD) | 1.66 (0.09) | 1.73 (0.06) | 1.61 (0.06) |
| Weight (kg; mean, SD) | 63.65 (12.06) | 71.57 (10.52) | 58.24 (9.83) |
| BMI (kg/m2;mean, SD) | 23.07 (3.47) | 23.79 (3.13) | 22.56 (3.61) |
| Kidney volume (mL, mean, SD) | 282.92 (50.00) | 310.05 (47.44) | 263.97 (42.41) |
| Liver volume (mL, mean, SD) | 1243.27 (279.96) | 1402.82 (262.00) | 1131.25 (234.43) |
| Pancreas volume (mL, mean, SD) | 62.91 (16.97) | 70.11 (17.04) | 57.83 (14.97) |
| Spleen volume (mL, mean, SD) | 195.26 (73.32) | 230.73 (78.73) | 170.39 (57.56) |
| EDLV volume (mL, mean, SD) | 135.01 (32.94) | 153.76 (35.91) | 121.91 (22.85) |
| ESLV volume (mL, mean, SD) | 53.21 (18.73) | 60.77 (21.18) | 47.92 (14.64) |
| EDRV volume (mL, mean, SD) | 142.23 (40.30) | 165.21 (43.99) | 126.16 (27.87) |
| ESRV volume (mL, mean, SD) | 71.43 (26.11) | 85.29 (27.71) | 61.68 (19.82) |
| IVC (mL, mean, SD) | 39.11 (17.34) | 42.92 (18.65) | 36.38 (15.81) |
| Lung (mL, mean, SD) | 4283.11 (1046.36) | 5084.58 (915.66) | 3723.23 (714.95) |
| AO (mL, mean, SD) | 114.82 (37.02) | 133.30 (36.74) | 101.98 (31.26) |
| L_INV (mL, mean, SD) | 8.93 (2.92) | 10.47 (3.04) | 7.86 (2.30) |
| BCT (mL, mean, SD) | 2.66 (1.44) | 3.25 (1.17) | 2.25 (1.47) |
| R_INV (mL, mean, SD) | 4.19 (1.40) | 4.79 (1.55) | 3.77 (1.12) |
| SVC (mL, mean, SD) | 11.22 (3.23) | 12.90 (3.52) | 10.05 (2.40) |
| LSA (mL, mean, SD) | 2.06 (0.79) | 2.52 (0.80) | 1.73 (0.60) |

*SD: standard deviation. EDLV, End-Diastolic Left Ventricle; ESLV, End-Systolic Left Ventricle; EDRV, End-Diastolic Right Ventricle; ESRV, End-Systolic Right Ventricle; IVC, Inferior Vena Cava; AO, Aorta; L_INV, left brachiocephalic vein; BCT, Brachiocephalic Trunk; R_INV, right brachiocephalic vein; SVC, Superior Vena Cava; LSA, Left Subclavian Artery.

**Supplementary Table 2. Details of the Segmentation Foundation Models for multi-organs segmentation used in this study.**

| **Model name** | **Backbone** | **Download url** |
| --- | --- | --- |
| SAM | Vision Transformer-Huge | https://github.com/facebookresearch/segment-anything |
| SAM2 | Hierarchical Transformer-Large | https://github.com/facebookresearch/sam2 |
| MedSAM | Vision Transformer-Base | https://github.com/bowang-lab/MedSAM |
| MedSAM2 | Hierarchical Transformer-Tiny | https://github.com/bowang-lab/MedSAM2 |
| SAT | UNet | https://github.com/zhaoziheng/SAT |
| TotalSegmentator | nnUNet | https://github.com/wasserth/TotalSegmentator |

**Supplementary Table 3. Overall segmentation accuracy (with metric of DSC) of ensemble (average) strategy and baselines.**

|  | **Kidney** | **Liver** | **Pancreas** | **Spleen** | **EDLV** | **EDRV** | **ESLV** | **ESRV** | **IVC** | **Lung** | **AO** | **L_INV** | **BCT** | **R_INV** | **SVC** | **LSA** |
| --- | --- | --- | --- | --- | --- | --- | --- | --- | --- | --- | --- | --- | --- | --- | --- | --- |
| **SAM** | 0.89 | 0.87 | 0.59 | 0.83 | 0.90 | 0.89 | 0.83 | 0.80 | 0.78 | 0.96 | 0.77 | 0.63 | 0.58 | 0.72 | 0.74 | 0.61 |
| **SAM2** | 0.87 | 0.90 | 0.62 | 0.88 | 0.87 | 0.91 | 0.84 | 0.84 | 0.77 | 0.94 | 0.79 | 0.68 | 0.61 | 0.72 | 0.76 | 0.62 |
| **MedSAM** | 0.88 | 0.78 | 0.46 | 0.81 | 0.68 | 0.50 | 0.65 | 0.52 | 0.72 | 0.89 | 0.64 | 0.66 | 0.56 | 0.60 | 0.66 | 0.54 |
| **MedSAM2** | 0.80 | 0.90 | 0.67 | 0.86 | 0.87 | 0.88 | 0.84 | 0.83 | 0.67 | 0.90 | 0.79 | 0.66 | 0.58 | 0.66 | 0.69 | 0.56 |
| **SAT** | 0.89 | 0.90 | 0.51 | 0.84 | 0.55 | 0.30 | 0.36 | 0.14 | 0.34 | 0.94 | 0.72 | 0.78 | 0.63 | 0.72 | 0.65 | 0.50 |
| **TotalSeg** | 0.82 | 0.91 | 0.24 | 0.85 | 0.16 | 0.19 | 0.21 | 0.20 | 0.54 | 0.97 | 0.73 | 0.79 | 0.70 | 0.77 | 0.68 | 0.50 |
| **Manual** **annotation** | 0.97 | 0.98 | 0.87 | 0.96 | 0.96 | 0.94 | 0.86 | 0.89 | 0.83 | 1.00 | 0.96 | 0.92 | 0.82 | 0.91 | 0.92 | 0.86 |
| **Ensemble AVG** | 0.91 | 0.93 | 0.69 | 0.90 | 0.89 | 0.85 | 0.84 | 0.81 | 0.81 | 0.96 | 0.86 | 0.77 | 0.70 | 0.80 | 0.84 | 0.73 |

**Supplementary Table 4. Significant levels of heterogenicity of Segmentation Foundation Models’ overall accuracy between organs and vessels.**

|  | **SAM** | **SAM2** | **MedSAM** | **MedSAM2** | **SAT** | **TotalSeg** |
| --- | --- | --- | --- | --- | --- | --- |
| **p-value (DSC)** | 0.0080 (**) | 0.0040 (**) | 0.3827 (N.S.) | 0.0002 (***) | 0.8841 (N.S.) | 0.2646 (N.S.) |
| **p-value (HD95)** | 0.0609 (N.S.) | 0.0163 (*) | 0.0037 (**) | 0.0003 (***) | 0.3491 (N.S.) | 0.0881 (N.S.) |

The statistical test between groups was performed using analysis of variance (ANOVA). Statistical significance: * p<0.05; ** p<0.01; *** p<0.001; **** p<0.0001; N.S., not significant.

**Supplementary Table 5. Significance levels of heterogenicity of overall accuracy (with metric of DSC) cross Segmentation Foundation Models.**

|  | **SAM** | **SAM2** | **MedSAM** | **MedSAM2** | **SAT** | **TotalSeg** |
| --- | --- | --- | --- | --- | --- | --- |
| **SAM** | 1.0000 (N.S.) | 0.7144 (N.S.) | 0.0155 (*) | 0.7556 (N.S.) | 0.0206 (*) | 0.0191 (*) |
| **SAM2** | 0.7144 (N.S.) | 1.0000 (N.S.) | 0.0050 (**) | 0.4850 (N.S.) | 0.0108 (*) | 0.0111 (*) |
| **MedSAM** | 0.0155 (*) | 0.0050 (**) | 1.0000 (N.S.) | 0.0277 (*) | 0.4759 (N.S.) | 0.3236 (N.S.) |
| **MedSAM2** | 0.7556 (N.S.) | 0.4850 (N.S.) | 0.0277 (*) | 1.0000 (N.S.) | 0.0309 (*) | 0.0271 (*) |
| **SAT** | 0.0206 (*) | 0.0108 (*) | 0.4759 (N.S.) | 0.0309 (*) | 1.0000 (N.S.) | 0.7481 (N.S.) |
| **TotalSeg** | 0.0191 (*) | 0.0111 (*) | 0.3236 (N.S.) | 0.0271 (*) | 0.7481 (N.S.) | 1.0000 (N.S.) |

The statistical test between groups was performed using analysis of variance (ANOVA). Statistical significance: * p<0.05; ** p<0.01; *** p<0.001; **** p<0.0001; N.S., not significant.

**Supplementary Table 6. Significance levels of heterogenicity of overall accuracy (with metric of HD95) cross Segmentation Foundation Models.**

|  | **SAM** | **SAM2** | **MedSAM** | **MedSAM2** | **SAT** | **TotalSeg** |
| --- | --- | --- | --- | --- | --- | --- |
| **SAM** | 1.0000 (N.S.) | 0.5487 (N.S.) | 0.6446 (N.S.) | 0.7135 (N.S.) | 0.0025 (**) | 0.0127 (*) |
| **SAM2** | 0.5487 (N.S.) | 1.0000 (N.S.) | 0.9826 (N.S.) | 0.7827 (N.S.) | 0.0030 (**) | 0.0136 (*) |
| **MedSAM** | 0.6446 (N.S.) | 0.9826 (N.S.) | 1.0000 (N.S.) | 0.8368 (N.S.) | 0.0032 (**) | 0.0138 (*) |
| **MedSAM2** | 0.7135 (N.S.) | 0.7827 (N.S.) | 0.8368 (N.S.) | 1.0000 (N.S.) | 0.0027 (**) | 0.0132 (*) |
| **SAT** | 0.0025 (**) | 0.0030 (**) | 0.0032 (**) | 0.0027 (**) | 1.0000 (N.S.) | 0.1812 (N.S.) |
| **TotalSeg** | 0.0127 (*) | 0.0136 (*) | 0.0138 (*) | 0.0132 (*) | 0.1812 (N.S.) | 1.0000 (N.S.) |
